# Supplementary material for: A national cross-sectional survey of the attitudes, skills and use of evidence-based practice amongst Spanish osteopaths
Source: PubMed Central journal article supplement (PMC7874623; doi:10.1186/s12913-021-06128-6), 2021-02-10
Supplement: 12913_2021_6128_MOESM1_ESM.pdf [file 12913_2021_6128_MOESM1_ESM.pdf]

**Welcome**

Evidence-based practice (EBP) is described as a problem-solving framework that facilitates the use of the best available evidence to make decisions about the care of individual patients. Although the use of EBP amongst all health professions is encouraged, we do not yet have a good understanding of osteopath's use of EBP. This study serves to address this need.

If you are an osteopath, we invite you to participate in this brief (10-minute) survey to explore osteopath use, opinion, skills and training in EBP, as well as the barriers and enablers of EBP use, in order to better understand the factors that may influence an osteopath's uptake of EBP.

By completing this survey you are consenting to participation in this study; however, your participation is voluntary and you can withdraw from the study at any time. Your participation and/or withdrawal from this study will have no impact on your relationship with the researchers or their affiliated institutions. You also have the right to ask any questions about the study at any time. So please contact Dr Oliver Thomson as per the contact information below if you have any questions or concerns relating to this study.

Please note that all information collected will remain confidential, and that the data obtained will not be used for any other purpose except for this study. Findings from the study may be published in a peer-reviewed journal, disseminated to professional manual therapy associations, and presented at international conferences and research seminars. A summary of the research findings also will be available to participants (upon request) from 1st August 2017. While your responses will be kept confidential by the researchers and not be identified in the reporting of this research, the researcher cannot guarantee the confidentiality or anonymity of material transferred by email or the internet.

This study has been approved by the British School of Osteopathy Research Ethics Committee. Any ethical concerns relating to the conduct of this study can be addressed to the Secretary of the British School of Osteopathy Research Ethics Committee, Dr Mike Ford, on 0207 089 5330 or [m.ford@bso.ac.uk](mailto:m.ford@bso.ac.uk).

Sincerely,

Dr Oliver Thomson  
Senior Lecturer | British School of Osteopathy  
275 Borough High Street, London, SE1 1JE  
Tel: 020 70895330 | Email: [o.thomson@bso.ac.uk](mailto:o.thomson@bso.ac.uk)

**INNOVATE Project Team:**

Dr. Oliver Thomson | BSc(Hons), DO, MSc, PhD | British School of Osteopathy, United Kingdom

Dr. Michael Ford | PhD | British School of Osteopathy, United Kingdom

Dr. Tobias Sundberg | PT, DO, BScMed, MScMed, PhD | Karolinska Institutet, Sweden

Dr. Matthew Leach | RN, BN(Hons), ND, PhD | University of South Australia, Australia

Prof. Jon Adams | BA(Hons), MA, PhD | University of Technology Sydney, Australia

Dr. Phil Austin | BSc(Osteopathy), MSc, PhD | Pallister House, Greenwich, Australia

**\* 1. Before proceeding, please indicate below whether you agree with the following statement:**

- I am a registered osteopath practicing in the United Kingdom,
- I understand what participation in this study entails, and
- I know what my rights are as a participant in this study

I agree

I disagree

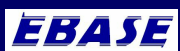

**INNOVATE-UK: International Osteopathy and Evidence-Based Practice Project**

**PART A: Beliefs**

Part A of the survey asks you to rate your opinion on some statements relating to evidence-based practice; the scale ranges from strongly disagree to strongly agree (Please try to avoid answering 'neutral' unless you really are uncertain)

**\* 2. Evidence-based practice is necessary in the practice of osteopathy**

Strongly Disagree      Disagree      Neutral      Agree      Strongly Agree

                      

**\* 3. Professional literature (ie: journals & textbooks) and research findings are useful in my day-to-day practice**

Strongly Disagree      Disagree      Neutral      Agree      Strongly Agree

                      

**\* 4. I am interested in learning or improving the skills necessary to incorporate evidence-based practice into my osteopathic practice**

Strongly Disagree      Disagree      Neutral      Agree      Strongly Agree

**\* 5. Evidence-based practice improves the quality of my patient's care**

|                       |                       |                       |                       |                       |
|-----------------------|-----------------------|-----------------------|-----------------------|-----------------------|
| Strongly Disagree     | Disagree              | Neutral               | Agree                 | Strongly Agree        |
| <input type="radio"/> | <input type="radio"/> | <input type="radio"/> | <input type="radio"/> | <input type="radio"/> |

**\* 6. Evidence-based practice assists me in making decisions about patient care**

|                       |                       |                       |                       |                       |
|-----------------------|-----------------------|-----------------------|-----------------------|-----------------------|
| Strongly Disagree     | Disagree              | Neutral               | Agree                 | Strongly Agree        |
| <input type="radio"/> | <input type="radio"/> | <input type="radio"/> | <input type="radio"/> | <input type="radio"/> |

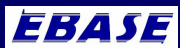

**INNOVATE-UK: International Osteopathy and Evidence-Based Practice Project**

**PART A: Beliefs (continued)**

Please continue to rate your opinion on the following statements about evidence-based practice

**\* 7. Evidence-based practice takes into account my clinical experience when making clinical decisions**

|                       |                       |                       |                       |                       |
|-----------------------|-----------------------|-----------------------|-----------------------|-----------------------|
| Strongly Disagree     | Disagree              | Neutral               | Agree                 | Strongly Agree        |
| <input type="radio"/> | <input type="radio"/> | <input type="radio"/> | <input type="radio"/> | <input type="radio"/> |

**\* 8. Evidence-based practice takes into account a patient's preference for treatment**

|                       |                       |                       |                       |                       |
|-----------------------|-----------------------|-----------------------|-----------------------|-----------------------|
| Strongly Disagree     | Disagree              | Neutral               | Agree                 | Strongly Agree        |
| <input type="radio"/> | <input type="radio"/> | <input type="radio"/> | <input type="radio"/> | <input type="radio"/> |

**\* 9. The adoption of evidence-based practice places an unreasonable demand on my practice**

|                       |                       |                       |                       |                       |
|-----------------------|-----------------------|-----------------------|-----------------------|-----------------------|
| Strongly Disagree     | Disagree              | Neutral               | Agree                 | Strongly Agree        |
| <input type="radio"/> | <input type="radio"/> | <input type="radio"/> | <input type="radio"/> | <input type="radio"/> |

**\* 10. There is a lack of evidence from clinical trials to support most of the treatments I use in my practice**

|                       |                       |                       |                       |                       |
|-----------------------|-----------------------|-----------------------|-----------------------|-----------------------|
| Strongly Disagree     | Disagree              | Neutral               | Agree                 | Strongly Agree        |
| <input type="radio"/> | <input type="radio"/> | <input type="radio"/> | <input type="radio"/> | <input type="radio"/> |

**\* 11. Prioritizing evidence-based practice within osteopathic practice is fundamental to the advancement of the profession**

|                       |                       |                       |                       |                       |
|-----------------------|-----------------------|-----------------------|-----------------------|-----------------------|
| Strongly Disagree     | Disagree              | Neutral               | Agree                 | Strongly Agree        |
| <input type="radio"/> | <input type="radio"/> | <input type="radio"/> | <input type="radio"/> | <input type="radio"/> |

**PART B: Skills**

Part B of the survey asks you to rate your current level of skill in several areas relating to evidence-based practice; the 5-point scale ranges from low to high.

**\* 12. Identifying knowledge gaps in practice**

|                 | Low                   | Low-medium            | Medium                | Medium-high           | High                  |
|-----------------|-----------------------|-----------------------|-----------------------|-----------------------|-----------------------|
| Level of skill: | <input type="radio"/> | <input type="radio"/> | <input type="radio"/> | <input type="radio"/> | <input type="radio"/> |

**\* 13. Identifying answerable clinical questions**

|                 | Low                   | Low-medium            | Medium                | Medium-high           | High                  |
|-----------------|-----------------------|-----------------------|-----------------------|-----------------------|-----------------------|
| Level of skill: | <input type="radio"/> | <input type="radio"/> | <input type="radio"/> | <input type="radio"/> | <input type="radio"/> |

**\* 14. Locating professional literature (i.e. journal articles)**

|                 | Low                   | Low-medium            | Medium                | Medium-high           | High                  |
|-----------------|-----------------------|-----------------------|-----------------------|-----------------------|-----------------------|
| Level of skill: | <input type="radio"/> | <input type="radio"/> | <input type="radio"/> | <input type="radio"/> | <input type="radio"/> |

**\* 15. Online database searching (e.g. PubMed)**

|                 | Low                   | Low-medium            | Medium                | Medium-high           | High                  |
|-----------------|-----------------------|-----------------------|-----------------------|-----------------------|-----------------------|
| Level of skill: | <input type="radio"/> | <input type="radio"/> | <input type="radio"/> | <input type="radio"/> | <input type="radio"/> |

**\* 16. Retrieving evidence**

|                 | Low                   | Low-medium            | Medium                | Medium-high           | High                  |
|-----------------|-----------------------|-----------------------|-----------------------|-----------------------|-----------------------|
| Level of skill: | <input type="radio"/> | <input type="radio"/> | <input type="radio"/> | <input type="radio"/> | <input type="radio"/> |

**PART B: Skills (continued)**

Please continue to rate your current level of skill in the following areas relating to evidence-based practice.

**\* 17. Critical appraisal of evidence**

|                 | Low                   | Low-medium            | Medium                | Medium-high           | High                  |
|-----------------|-----------------------|-----------------------|-----------------------|-----------------------|-----------------------|
| Level of skill: | <input type="radio"/> | <input type="radio"/> | <input type="radio"/> | <input type="radio"/> | <input type="radio"/> |

**\* 18. Synthesis of research evidence**

|                 | Low                   | Low-medium            | Medium                | Medium-high           | High                  |
|-----------------|-----------------------|-----------------------|-----------------------|-----------------------|-----------------------|
| Level of skill: | <input type="radio"/> | <input type="radio"/> | <input type="radio"/> | <input type="radio"/> | <input type="radio"/> |

**\* 19. Applying research evidence to patient cases**

|                 | Low                   | Low-medium            | Medium                | Medium-high           | High                  |
|-----------------|-----------------------|-----------------------|-----------------------|-----------------------|-----------------------|
| Level of skill: | <input type="radio"/> | <input type="radio"/> | <input type="radio"/> | <input type="radio"/> | <input type="radio"/> |

**\* 20. Sharing evidence with colleagues**

|                 | Low                   | Low-medium            | Medium                | Medium-high           | High                  |
|-----------------|-----------------------|-----------------------|-----------------------|-----------------------|-----------------------|
| Level of skill: | <input type="radio"/> | <input type="radio"/> | <input type="radio"/> | <input type="radio"/> | <input type="radio"/> |

**\* 21. Conducting clinical research (e.g. clinical trials)**

|                 | Low                   | Low-medium            | Medium                | Medium-high           | High                  |
|-----------------|-----------------------|-----------------------|-----------------------|-----------------------|-----------------------|
| Level of skill: | <input type="radio"/> | <input type="radio"/> | <input type="radio"/> | <input type="radio"/> | <input type="radio"/> |

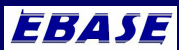

**INNOVATE-UK: International Osteopathy and Evidence-Based Practice Project**

**PART B: Skills (continued)**

Please continue to rate your current level of skill in the following areas relating to evidence-based practice.

**\* 22. Using findings from clinical research**

|                 | Low                   | Low-medium            | Medium                | Medium-high           | High                  |
|-----------------|-----------------------|-----------------------|-----------------------|-----------------------|-----------------------|
| Level of skill: | <input type="radio"/> | <input type="radio"/> | <input type="radio"/> | <input type="radio"/> | <input type="radio"/> |

**\* 23. Conducting systematic reviews**

|                 | Low                   | Low-medium            | Medium                | Medium-high           | High                  |
|-----------------|-----------------------|-----------------------|-----------------------|-----------------------|-----------------------|
| Level of skill: | <input type="radio"/> | <input type="radio"/> | <input type="radio"/> | <input type="radio"/> | <input type="radio"/> |

**\* 24. Using findings from systematic reviews**

|                 | Low                   | Low-medium            | Medium                | Medium-high           | High                  |
|-----------------|-----------------------|-----------------------|-----------------------|-----------------------|-----------------------|
| Level of skill: | <input type="radio"/> | <input type="radio"/> | <input type="radio"/> | <input type="radio"/> | <input type="radio"/> |

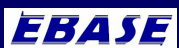

**INNOVATE-UK: International Osteopathy and Evidence-Based Practice Project**

## PART C: Training

Part C of the survey asks you to indicate the highest level of training/education you have received across several areas relating to evidence-based practice.

### \* 25. Evidence-based practice / evidence-based osteopathy

- |                                                          |                                                          |
|----------------------------------------------------------|----------------------------------------------------------|
| <input type="radio"/> None                               | <input type="radio"/> Diploma                            |
| <input type="radio"/> Seminar (less than 1 day)          | <input type="radio"/> Minor component of a study program |
| <input type="radio"/> Short course (less than 1 week)    | <input type="radio"/> Major component of a study program |
| <input type="radio"/> Specific course (1 week or longer) | <input type="radio"/> Other                              |
| <input type="radio"/> Certificate                        |                                                          |

If you selected other, please specify

### \* 26. Applying research evidence to clinical practice

- |                                                          |                                                          |
|----------------------------------------------------------|----------------------------------------------------------|
| <input type="radio"/> None                               | <input type="radio"/> Diploma                            |
| <input type="radio"/> Seminar (less than 1 day)          | <input type="radio"/> Minor component of a study program |
| <input type="radio"/> Short course (less than 1 week)    | <input type="radio"/> Major component of a study program |
| <input type="radio"/> Specific course (1 week or longer) | <input type="radio"/> Other                              |
| <input type="radio"/> Certificate                        |                                                          |

If you selected other, please specify

### \* 27. Conducting clinical research (i.e. clinical trials)

- |                                                          |                                                          |
|----------------------------------------------------------|----------------------------------------------------------|
| <input type="radio"/> None                               | <input type="radio"/> Diploma                            |
| <input type="radio"/> Seminar (less than 1 day)          | <input type="radio"/> Minor component of a study program |
| <input type="radio"/> Short course (less than 1 week)    | <input type="radio"/> Major component of a study program |
| <input type="radio"/> Specific course (1 week or longer) | <input type="radio"/> Other                              |
| <input type="radio"/> Certificate                        |                                                          |

If you selected other, please specify

**\* 28. Conducting systematic reviews or meta-analysis (i.e. statistical analysis of data combined from two or more studies)**

- |                                                          |                                                          |
|----------------------------------------------------------|----------------------------------------------------------|
| <input type="radio"/> None                               | <input type="radio"/> Diploma                            |
| <input type="radio"/> Seminar (less than 1 day)          | <input type="radio"/> Minor component of a study program |
| <input type="radio"/> Short course (less than 1 week)    | <input type="radio"/> Major component of a study program |
| <input type="radio"/> Specific course (1 week or longer) | <input type="radio"/> Other                              |
| <input type="radio"/> Certificate                        |                                                          |

If you selected other, please specify

**\* 29. Critical thinking / critical analysis**

- |                                                          |                                                          |
|----------------------------------------------------------|----------------------------------------------------------|
| <input type="radio"/> None                               | <input type="radio"/> Diploma                            |
| <input type="radio"/> Seminar (less than 1 day)          | <input type="radio"/> Minor component of a study program |
| <input type="radio"/> Short course (less than 1 week)    | <input type="radio"/> Major component of a study program |
| <input type="radio"/> Specific course (1 week or longer) | <input type="radio"/> Other                              |
| <input type="radio"/> Certificate                        |                                                          |

If you selected other, please specify

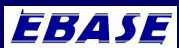

**INNOVATE-UK: International Osteopathy and Evidence-Based Practice Project**

**PART D: Use**

Part D of the survey asks you indicate how often you have performed certain evidence-based practice related activities over the last month.

**\* 30. I have read/reviewed professional literature (i.e. professional journals & textbooks) related to my practice**

|                      |                       |                       |                       |                       |                       |
|----------------------|-----------------------|-----------------------|-----------------------|-----------------------|-----------------------|
|                      | 0 articles            | 1-5 articles          | 6-10 articles         | 11-15 articles        | 16 + articles         |
| Over the last month: | <input type="radio"/> | <input type="radio"/> | <input type="radio"/> | <input type="radio"/> | <input type="radio"/> |

**\* 31. I have read/reviewed clinical research findings related to my practice**

|                      |                       |                       |                       |                       |                       |
|----------------------|-----------------------|-----------------------|-----------------------|-----------------------|-----------------------|
|                      | 0 articles            | 1-5 articles          | 6-10 articles         | 11-15 articles        | 16 + articles         |
| Over the last month: | <input type="radio"/> | <input type="radio"/> | <input type="radio"/> | <input type="radio"/> | <input type="radio"/> |

\* 32. I have used professional literature or research findings to assist my clinical decision-making

|                      | Never                 | 1-5 times             | 6-10 times            | 11-15 times           | 16 + times            |
|----------------------|-----------------------|-----------------------|-----------------------|-----------------------|-----------------------|
| Over the last month: | <input type="radio"/> | <input type="radio"/> | <input type="radio"/> | <input type="radio"/> | <input type="radio"/> |

\* 33. I have used professional literature or research findings to change my clinical practice

|                      | Never                 | 1-5 times             | 6-10 times            | 11-15 times           | 16 + times            |
|----------------------|-----------------------|-----------------------|-----------------------|-----------------------|-----------------------|
| Over the last month: | <input type="radio"/> | <input type="radio"/> | <input type="radio"/> | <input type="radio"/> | <input type="radio"/> |

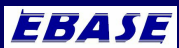

**INNOVATE-UK: International Osteopathy and Evidence-Based Practice Project**

**PART D: Use (continued)**

Please continue to indicate how often you have performed certain evidence-based practice related activities over the last month.

\* 34. I have used an online database (e.g. PubMed, MEDLINE) to search for practice related literature or research

|                      | Never                 | 1-5 times             | 6-10 times            | 11-15 times           | 16 + times            |
|----------------------|-----------------------|-----------------------|-----------------------|-----------------------|-----------------------|
| Over the last month: | <input type="radio"/> | <input type="radio"/> | <input type="radio"/> | <input type="radio"/> | <input type="radio"/> |

\* 35. I have used an online search engine (e.g. Google) to search for practice related literature or research

|                      | Never                 | 1-5 times             | 6-10 times            | 11-15 times           | 16 + times            |
|----------------------|-----------------------|-----------------------|-----------------------|-----------------------|-----------------------|
| Over the last month: | <input type="radio"/> | <input type="radio"/> | <input type="radio"/> | <input type="radio"/> | <input type="radio"/> |

\* 36. I have consulted a colleague or industry expert to assist my clinical decision-making

|                      | Never                 | 1-5 times             | 6-10 times            | 11-15 times           | 16 + times            |
|----------------------|-----------------------|-----------------------|-----------------------|-----------------------|-----------------------|
| Over the last month: | <input type="radio"/> | <input type="radio"/> | <input type="radio"/> | <input type="radio"/> | <input type="radio"/> |

\* 37. I have referred to magazines, layperson/self-help books, or non-government/non-education institution websites to assist my clinical decision-making

|                      | Never                 | 1-5 times             | 6-10 times            | 11-15 times           | 16 + times            |
|----------------------|-----------------------|-----------------------|-----------------------|-----------------------|-----------------------|
| Over the last month: | <input type="radio"/> | <input type="radio"/> | <input type="radio"/> | <input type="radio"/> | <input type="radio"/> |

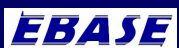

**INNOVATE-UK: International Osteopathy and Evidence-Based Practice Project**

**PART D: Use (continued)**



Please answer the following questions about your use of evidence-based practice as indicated.

**\* 38. What percentage of your practice do you estimate is based on clinical research evidence (i.e. evidence from clinical trials)?**

- None (0%)
- Very small proportion (1-25%)
- Small proportion (26-50%)
- Moderate proportion (51-75%)
- Large proportion (76-99%)
- All (100%)

**\* 39. When you are making clinical decisions, in what order do the following sources of information inform the basis of your decision? (Please rank the items from 1 to 10, with 1 being the most frequently used source of information, to 10 being the least frequently used source of information)**

|   |                      |                                                                               |
|---|----------------------|-------------------------------------------------------------------------------|
| ☰ | <input type="text"/> | Published clinical evidence (i.e. clinical trials)                            |
| ☰ | <input type="text"/> | Published experimental/laboratory evidence (i.e. animal or test tube studies) |
| ☰ | <input type="text"/> | Traditional knowledge                                                         |
| ☰ | <input type="text"/> | Consulting fellow practitioners or experts                                    |
| ☰ | <input type="text"/> | Personal intuition                                                            |
| ☰ | <input type="text"/> | Trial and error                                                               |
| ☰ | <input type="text"/> | Textbooks                                                                     |
| ☰ | <input type="text"/> | Clinical practice guidelines                                                  |
| ☰ | <input type="text"/> | Patient preference                                                            |
| ☰ | <input type="text"/> | Personal preference                                                           |

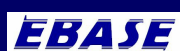

**PART E: Barriers**

Part E of the survey asks you to indicate to what extent certain factors prevent you from participating in evidence-based practice; the scale ranges from 'not a barrier' to 'major barrier'.

**\* 40. Lack of time**

|                       |                       |                       |                       |
|-----------------------|-----------------------|-----------------------|-----------------------|
| Not a barrier         | A minor barrier       | A moderate barrier    | A major barrier       |
| <input type="radio"/> | <input type="radio"/> | <input type="radio"/> | <input type="radio"/> |

**\* 41. Lack of resources (i.e. access to a computer, the internet or online databases)**

|                       |                       |                       |                       |
|-----------------------|-----------------------|-----------------------|-----------------------|
| Not a barrier         | A minor barrier       | A moderate barrier    | A major barrier       |
| <input type="radio"/> | <input type="radio"/> | <input type="radio"/> | <input type="radio"/> |

**\* 42. Lack of clinical evidence in osteopathy**

|                       |                       |                       |                       |
|-----------------------|-----------------------|-----------------------|-----------------------|
| Not a barrier         | A minor barrier       | A moderate barrier    | A major barrier       |
| <input type="radio"/> | <input type="radio"/> | <input type="radio"/> | <input type="radio"/> |

**\* 43. Insufficient skills for locating research**

|                       |                       |                       |                       |
|-----------------------|-----------------------|-----------------------|-----------------------|
| Not a barrier         | A minor barrier       | A moderate barrier    | A major barrier       |
| <input type="radio"/> | <input type="radio"/> | <input type="radio"/> | <input type="radio"/> |

**\* 44. Insufficient skills for interpreting research**

|                       |                       |                       |                       |
|-----------------------|-----------------------|-----------------------|-----------------------|
| Not a barrier         | A minor barrier       | A moderate barrier    | A major barrier       |
| <input type="radio"/> | <input type="radio"/> | <input type="radio"/> | <input type="radio"/> |

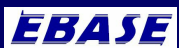

**PART E: Barriers (continued)**

Please continue to indicate to what extent these factors prevent you from participating in evidence-based practice

**\* 45. Insufficient skills to critically appraise / evaluate the literature**

|                       |                       |                       |                       |
|-----------------------|-----------------------|-----------------------|-----------------------|
| Not a barrier         | A minor barrier       | A moderate barrier    | A major barrier       |
| <input type="radio"/> | <input type="radio"/> | <input type="radio"/> | <input type="radio"/> |

**\* 46. Insufficient skills to apply research findings to clinical practice**

|                       |                       |                       |                       |
|-----------------------|-----------------------|-----------------------|-----------------------|
| Not a barrier         | A minor barrier       | A moderate barrier    | A major barrier       |
| <input type="radio"/> | <input type="radio"/> | <input type="radio"/> | <input type="radio"/> |

**\* 47. Lack of incentive to participate in evidence-based practice**

|                       |                       |                       |                       |
|-----------------------|-----------------------|-----------------------|-----------------------|
| Not a barrier         | A minor barrier       | A moderate barrier    | A major barrier       |
| <input type="radio"/> | <input type="radio"/> | <input type="radio"/> | <input type="radio"/> |

**\* 48. Lack of interest in evidence-based practice**

|                       |                       |                       |                       |
|-----------------------|-----------------------|-----------------------|-----------------------|
| Not a barrier         | A minor barrier       | A moderate barrier    | A major barrier       |
| <input type="radio"/> | <input type="radio"/> | <input type="radio"/> | <input type="radio"/> |



**INNOVATE-UK: International Osteopathy and Evidence-Based Practice Project**

**PART E: Barriers (continued)**

Please continue to indicate to what extent these factors prevent you from participating in evidence-based practice

**\* 49. Lack of relevance to osteopathy practice**

|                       |                       |                       |                       |
|-----------------------|-----------------------|-----------------------|-----------------------|
| Not a barrier         | A minor barrier       | A moderate barrier    | A major barrier       |
| <input type="radio"/> | <input type="radio"/> | <input type="radio"/> | <input type="radio"/> |

**\* 50. Lack of colleague support for evidence-based practice**

|                       |                       |                       |                       |
|-----------------------|-----------------------|-----------------------|-----------------------|
| Not a barrier         | A minor barrier       | A moderate barrier    | A major barrier       |
| <input type="radio"/> | <input type="radio"/> | <input type="radio"/> | <input type="radio"/> |

**\* 51. Lack of industry support for evidence-based practice**

|                       |                       |                       |                       |
|-----------------------|-----------------------|-----------------------|-----------------------|
| Not a barrier         | A minor barrier       | A moderate barrier    | A major barrier       |
| <input type="radio"/> | <input type="radio"/> | <input type="radio"/> | <input type="radio"/> |

**\* 52. Patient preference for treatment**

|                       |                       |                       |                       |
|-----------------------|-----------------------|-----------------------|-----------------------|
| Not a barrier         | A minor barrier       | A moderate barrier    | A major barrier       |
| <input type="radio"/> | <input type="radio"/> | <input type="radio"/> | <input type="radio"/> |



**INNOVATE-UK: International Osteopathy and Evidence-Based Practice Project**

**PART F: Facilitators**

Part F of the survey asks you indicate to what extent certain strategies assist you in participating in evidence-based practice; the scale ranges from 'not useful' to 'very useful'.

**\* 53. Access to the Internet in your workplace**

|                       |                       |                       |                       |
|-----------------------|-----------------------|-----------------------|-----------------------|
| Not useful            | Slightly useful       | Moderately useful     | Very useful           |
| <input type="radio"/> | <input type="radio"/> | <input type="radio"/> | <input type="radio"/> |

**\* 54. Access to free online databases in the workplace, such as Cochrane and PubMed**

|                       |                       |                       |                       |
|-----------------------|-----------------------|-----------------------|-----------------------|
| Not useful            | Slightly useful       | Moderately useful     | Very useful           |
| <input type="radio"/> | <input type="radio"/> | <input type="radio"/> | <input type="radio"/> |

**\* 55. Free access to online databases that usually require license fees, such as MEDLINE and CINAHL**

|                       |                       |                       |                       |
|-----------------------|-----------------------|-----------------------|-----------------------|
| Not useful            | Slightly useful       | Moderately useful     | Very useful           |
| <input type="radio"/> | <input type="radio"/> | <input type="radio"/> | <input type="radio"/> |

**\* 56. Ability to download full-text / full-length journal articles**

|                       |                       |                       |                       |
|-----------------------|-----------------------|-----------------------|-----------------------|
| Not useful            | Slightly useful       | Moderately useful     | Very useful           |
| <input type="radio"/> | <input type="radio"/> | <input type="radio"/> | <input type="radio"/> |

**\* 57. Access to online education materials related to evidence based practice**

|                       |                       |                       |                       |
|-----------------------|-----------------------|-----------------------|-----------------------|
| Not useful            | Slightly useful       | Moderately useful     | Very useful           |
| <input type="radio"/> | <input type="radio"/> | <input type="radio"/> | <input type="radio"/> |

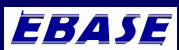

**PART F: Facilitators (continued)**

Please continue to indicate to what extent these factors assist you in participating in evidence-based practice

**\* 58. Access to tools used to assist the critical appraisal / evaluation of research evidence**

|                       |                       |                       |                       |
|-----------------------|-----------------------|-----------------------|-----------------------|
| Not useful            | Slightly useful       | Moderately useful     | Very useful           |
| <input type="radio"/> | <input type="radio"/> | <input type="radio"/> | <input type="radio"/> |

**\* 59. Access to critically appraised topics relevant to osteopathy (these are critical appraisals of single research papers)**

|                       |                       |                       |                       |
|-----------------------|-----------------------|-----------------------|-----------------------|
| Not useful            | Slightly useful       | Moderately useful     | Very useful           |
| <input type="radio"/> | <input type="radio"/> | <input type="radio"/> | <input type="radio"/> |

\* **60. Access to critical reviews of research evidence relevant to osteopathy (these are critical reviews of multiple research papers addressing a single topic)**

|                       |                       |                       |                       |
|-----------------------|-----------------------|-----------------------|-----------------------|
| Not useful            | Slightly useful       | Moderately useful     | Very useful           |
| <input type="radio"/> | <input type="radio"/> | <input type="radio"/> | <input type="radio"/> |

\* **61. Access to research rating tools that facilitate critical appraisal of single research papers**

|                       |                       |                       |                       |
|-----------------------|-----------------------|-----------------------|-----------------------|
| Not useful            | Slightly useful       | Moderately useful     | Very useful           |
| <input type="radio"/> | <input type="radio"/> | <input type="radio"/> | <input type="radio"/> |

\* **62. Access to online tools that assist you to conduct your own critical appraisals of multiple research papers related to a single topic**

|                       |                       |                       |                       |
|-----------------------|-----------------------|-----------------------|-----------------------|
| Not useful            | Slightly useful       | Moderately useful     | Very useful           |
| <input type="radio"/> | <input type="radio"/> | <input type="radio"/> | <input type="radio"/> |

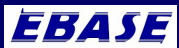

## INNOVATE-UK: International Osteopathy and Evidence-Based Practice Project

### PART G: Demographics

The final part of this survey asks you about your age, sex, qualifications and health-related work experience.

\* **63. Which category below includes your age?**

- 19 years or under
- 20-29 years
- 30-39 years
- 40-49 years
- 50-59 years
- 60-69 years
- 70 years or older

\* **64. What is your gender?**

- Male
- Female
- Other

**\* 65. What is your highest qualification?**

- High School Certificate
- Certificate
- Diploma
- Advanced Diploma
- Bachelor Degree
- Honours Degree
- Graduate Certificate / Diploma
- Masters Degree
- PhD / Doctorate

Other (please specify)



**INNOVATE-UK: International Osteopathy and Evidence-Based Practice Project**

**PART G: Demographics (continued)**

**\* 66. How many years ago did you receive your highest qualification?**

- Less than 1 year
- 1-5 years
- 6-10 years
- 11-15 years
- 16 years or over

**\* 67. How many years have you practiced osteopathy?**

- Less than 1 year
- 1-5 years
- 6-10 years
- 11-15 years
- 16 years or more

**\* 68. How many hours per week do you typically practice as an osteopath in a clinical setting?**

- 0 (none)
- 1-5 hours
- 6-10 hours
- 11-15 hours
- 16-20 hours
- 21-25 hours
- 26-30 hours
- 31-35 hours
- 36-40 hours
- 41-45 hours
- 46-50 hours
- 50+ hours

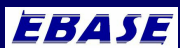

**INNOVATE-UK: International Osteopathy and Evidence-Based Practice Project**

**PART G: Demographics (continued)**

**\* 69. How many hours per week do you typically participate in research?**

- 0 (none)
- 1-5 hours
- 6-10 hours
- 11-15 hours
- 16-20 hours
- 21-25 hours
- 26-30 hours
- 31-35 hours
- 36-40 hours
- 41-45 hours
- 46-50 hours
- 50+ hours

\* 70. How many hours per week do you typically teach in the higher education sector?

- 0 (none)
- 1-5 hours
- 6-10 hours
- 11-15 hours
- 16-20 hours
- 21-25 hours
- 26-30 hours
- 31-35 hours
- 36-40 hours
- 41-45 hours
- 46-50 hours
- 50+ hours

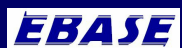

**INNOVATE-UK: International Osteopathy and Evidence-Based Practice Project**

**PART G: Demographics (continued)**



**\* 71. Which types of treatment / management do you typically provide in your first consultation as an osteopath? (please tick all that apply)**

- Articulation
- Acupuncture / acupressure
- Cranial technique
- Electrotherapy
- Exercise
- Functional technique
- General osteopathic treatment
- HVLA thrust
- Ice / cold treatment
- Muscle energy therapy
- Myofascial release (MFR)
- Orthotics
- Relaxation advice
- Soft tissue therapy
- Strain-counterstrain
- Steroid injection
- Visceral therapy
- Other (please specify)

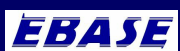

**\* 72. In what setting do you practice osteopathy predominantly?**

- Solo practice
- With a group of conventional medical (e.g. general practitioner) and allied health (e.g. physiotherapist) practitioners
- With a group of complementary and alternative medicine (CAM) practitioners
- With a combination of CAM and conventional medical and allied health practitioners
- Within a clinical institution (e.g. hospital, nursing home)
- Within an educational institution (e.g. university)

**\* 73. In which region of the UK do you practice osteopathy? (If you practice across multiple regions, please select the one that you practice in predominantly)**

- East Anglia
- London (UK)
- Midlands (UK)
- Northern Ireland
- North West UK
- North East UK
- Scotland
- South East UK
- South West UK
- Wales
- Other (please specify)

**\* 74. Which osteopathy professional associations are you a member of?**

- Foundation for Paediatric Osteopathy
- Institute of Classical Osteopathy (ICO)
- Institute of Osteopathy (iO)
- Molinari Institute Of Health
- Rollin E Becker Institute
- Society of Osteopaths in Animal Practice
- Sutherland Cranial College of Osteopathy
- Sutherland Society
- Other (please specify)

**PART G: Demographics (continued)**

**\* 75. In what geographical region do you practice osteopathy? (If you practice across several geographical regions, please select the one region that you practice in predominantly)**

- City (Central business district)
- Inner city suburbs
- Outer city suburbs
- Rural / remote region

**76. Are there any final comments you would like to add about evidence-based practice?**

Thank you immensely for your participation in this survey - we are most grateful for your time and contribution.
